# Supplementary material
Source: bioRxiv or medRxiv preprint supplement (https://www.biorxiv.org/highwire/filestream/86441/field_highwire_adjunct_files/5/090795-14.pdf)

S12 Fig. Large set of abundance plots for the taxa from each of the genes, KEGG pathways, and PID pathways that harbored prevalent LoF mutations and showed significance as a means of predicting the interaction between the mutation and the microbiota. Abundances are plotted as both column dot plots as well as horizontal bar plots of the differences in the mean abundances of a subset of the taxa predicted to interact differentially with tumors with a LoF mutation relative to those without the indicated mutation. These subsets represent those taxa that had a mean difference in abundance of greater than 0.1%, proportionally.

## **S12 Fig | Abundance Barcharts.**

### **Genes**

# ***ANKRD36C***

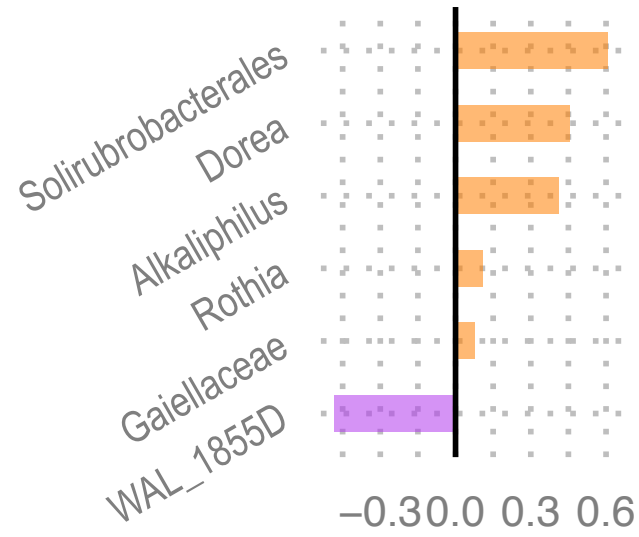

**APC**

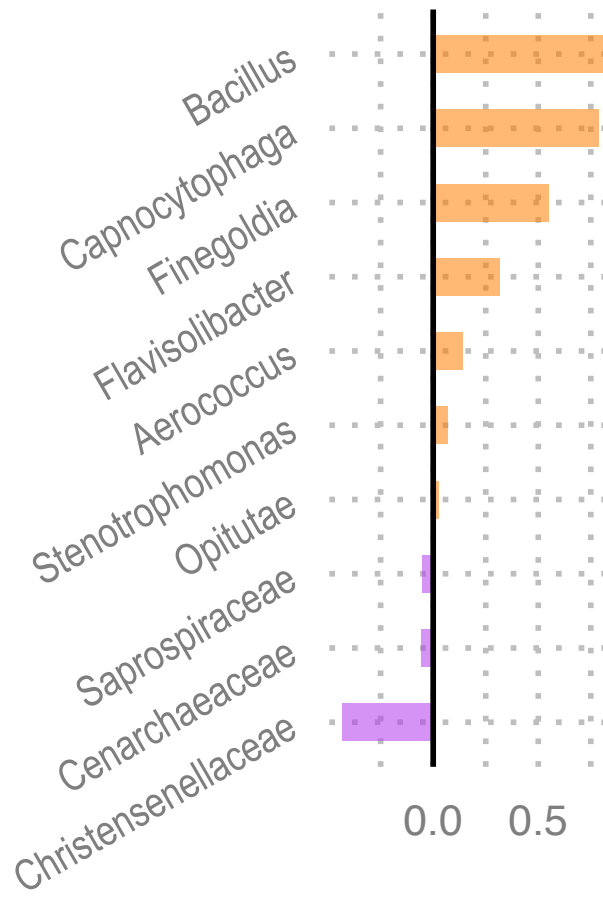

***CTBP2***

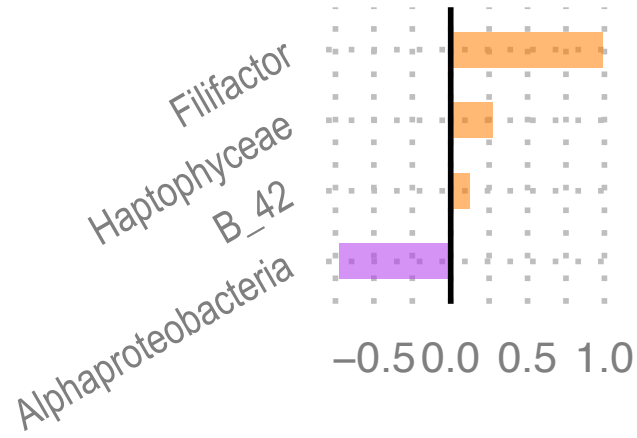

# ***KMT2C***

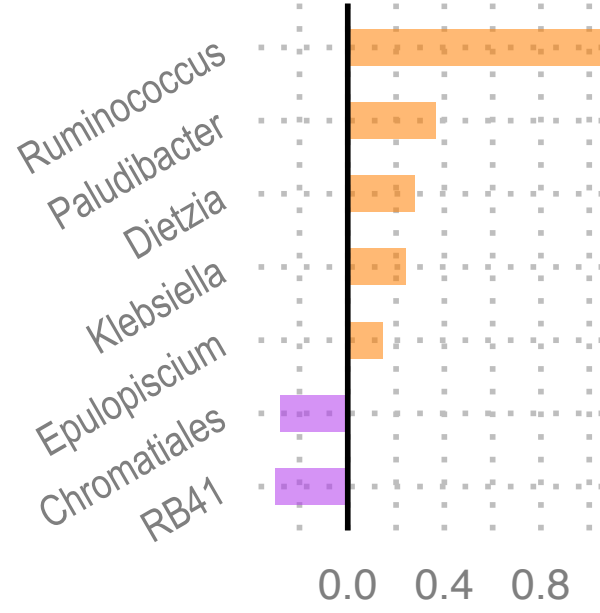

# ZNF717

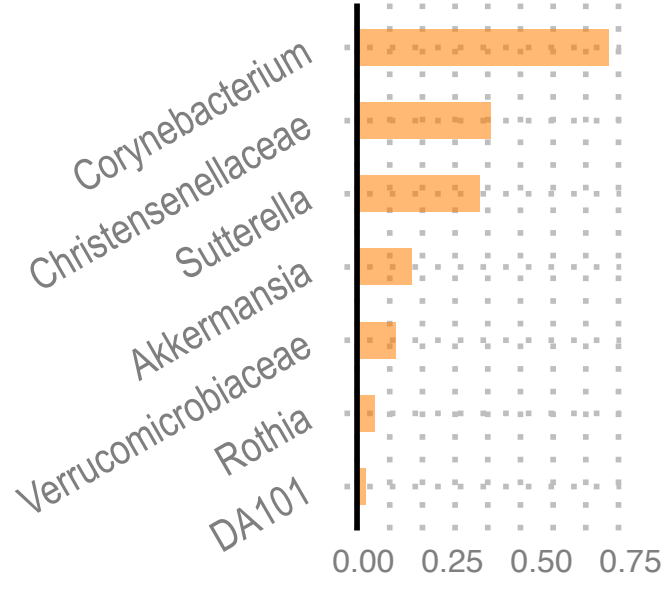

# S12 Fig | Abundance Barcharts.

KEGG



### ABC transporters

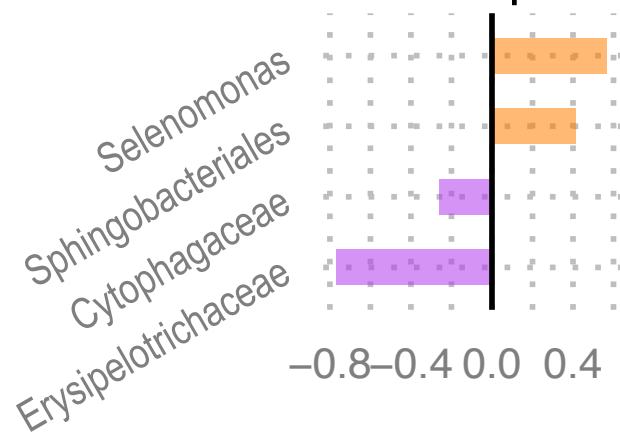

### Adherens junction

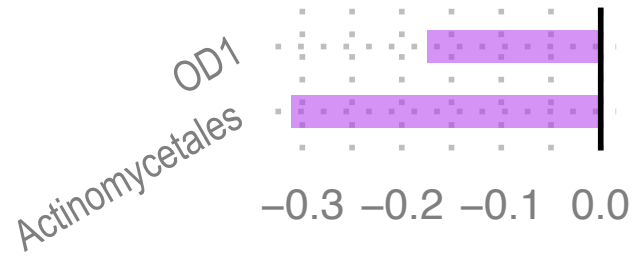

## Alanine, aspartate, and glutamate metabolism

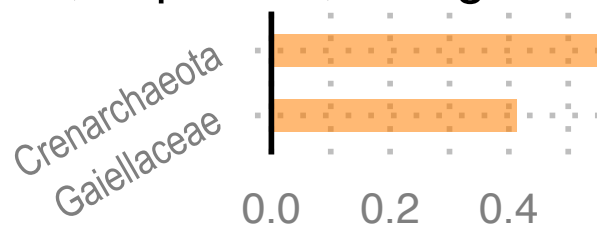

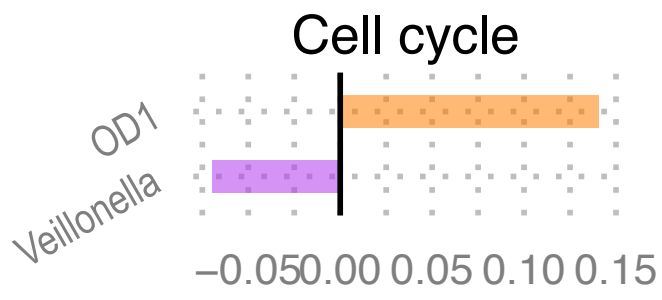

***Cysteine and methionine metabolism***

File intentionally blank -no taxa met the abundance-difference threshold for inclusion

### Focal adhesion

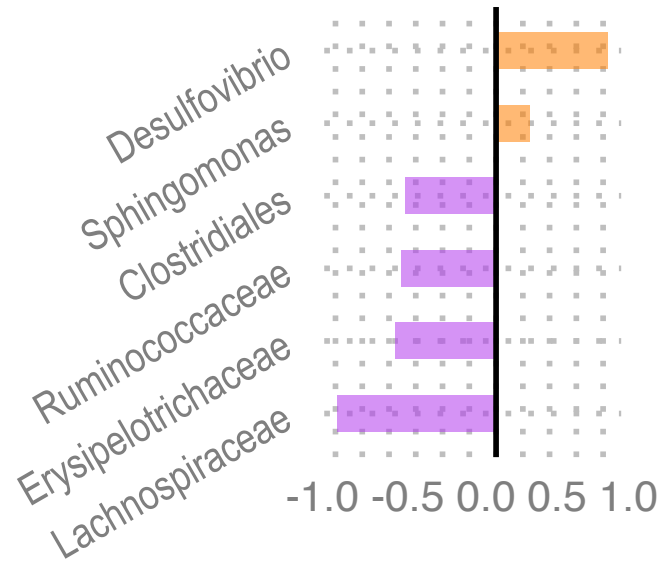

## Lysine degradation

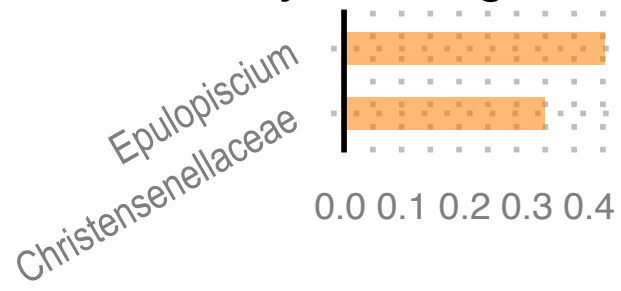

# MAPK signaling pathway

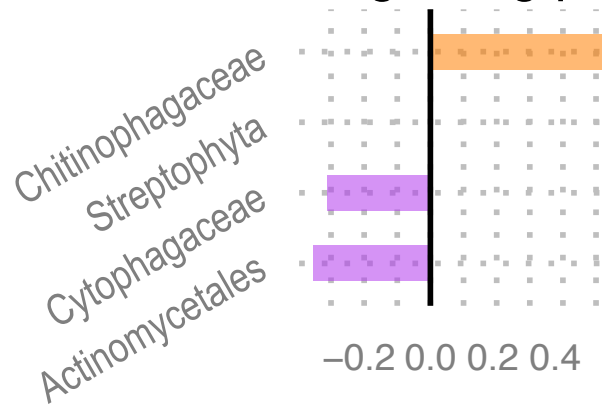



# Notch signaling pathway

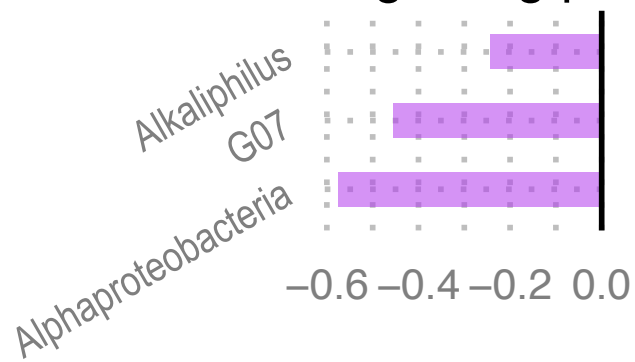

## Oocyte meiosis

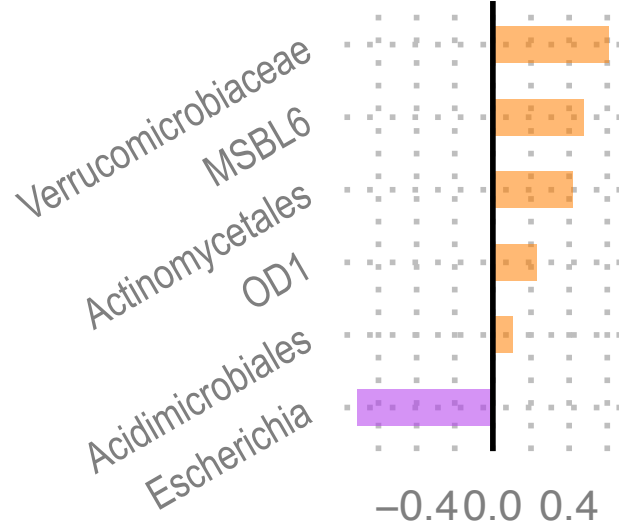

# Oxidative phosphorylation

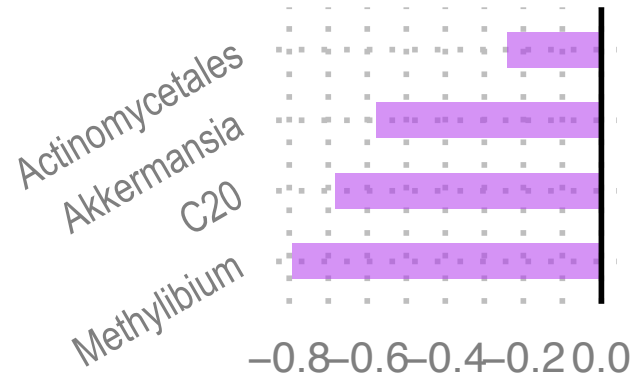

***Phosphatidylinositol signaling system***

File intentionally blank -no taxa met the abundance-difference threshold for inclusion

# Protein processing in endoplasmic reticulum

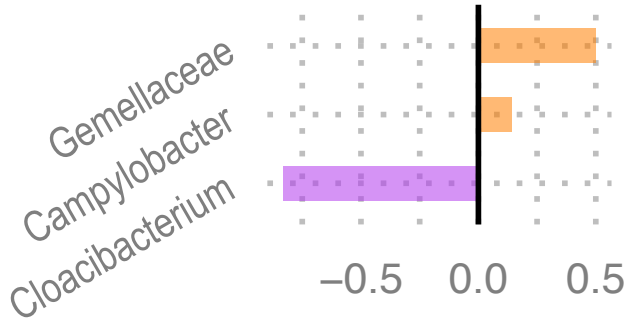

# Purine metabolism

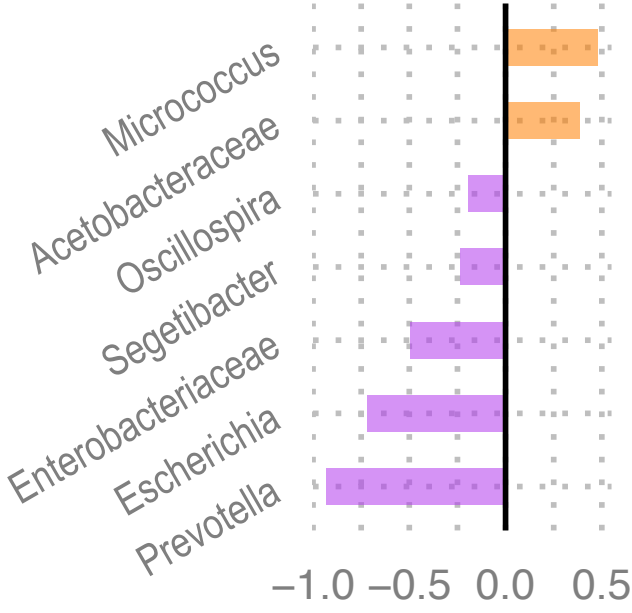

## Regulation of actin cytoskeleton

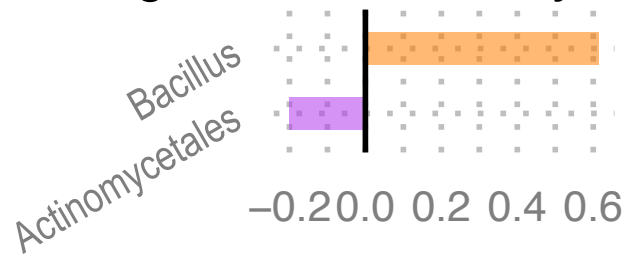

# Ribosome

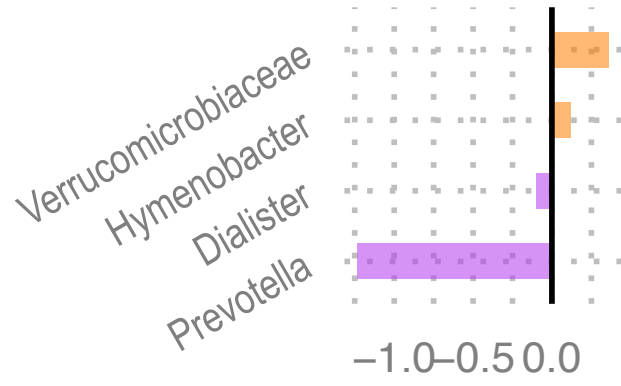



### RNA degradation

Prevotella  
PeHg47

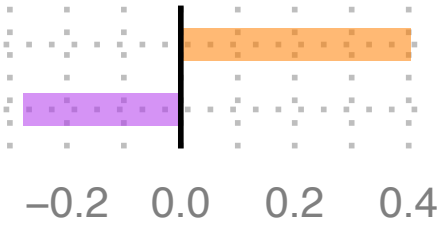

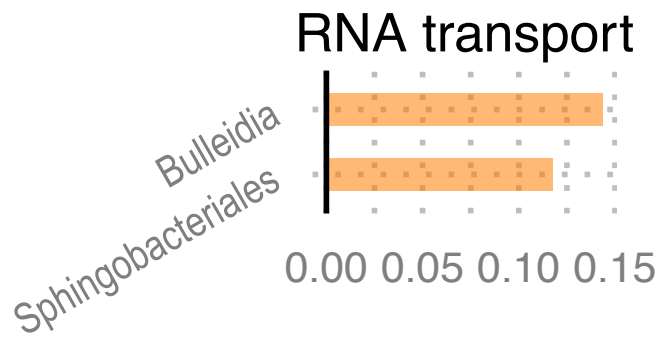

# Spliceosome

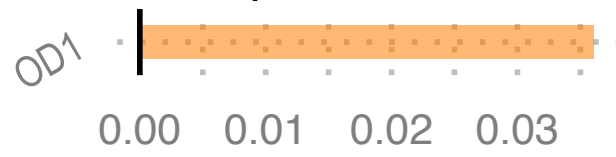

***Ubiquitin mediated proteolysis***

File intentionally blank -no taxa met the abundance-difference threshold for inclusion

# Wnt signaling pathway

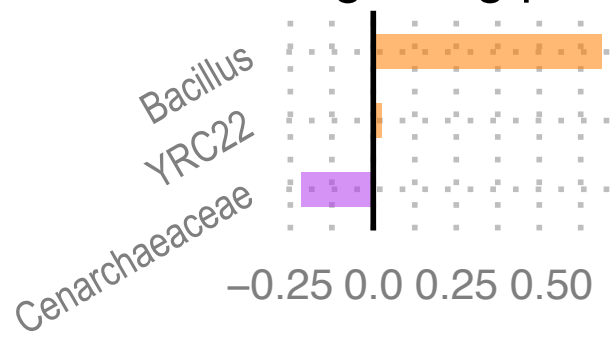

# S12 Fig I Abundance Barcharts.

PID

***Canonical Wnt signaling pathway***

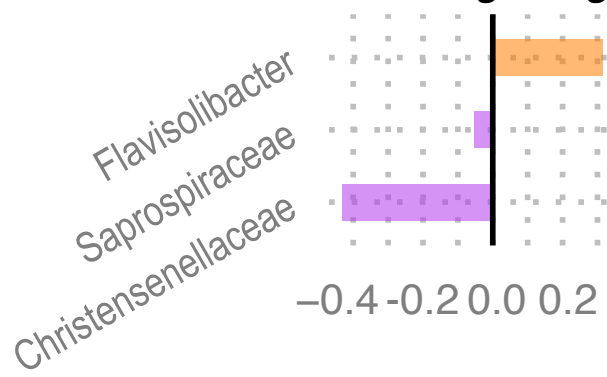

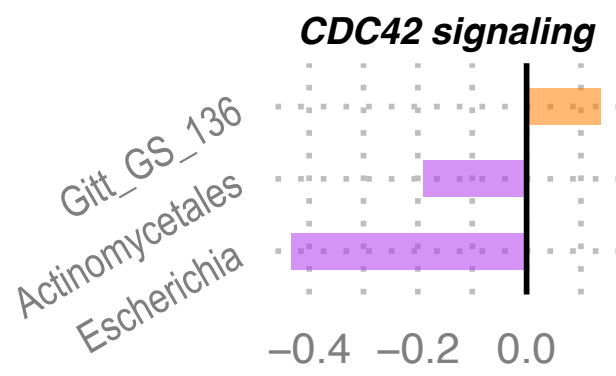



***CXCR4-mediated signaling***

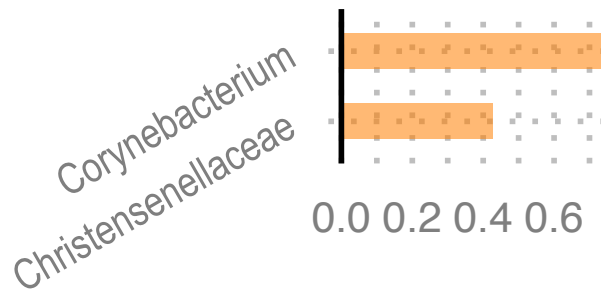

**Degradation of beta-catenin**

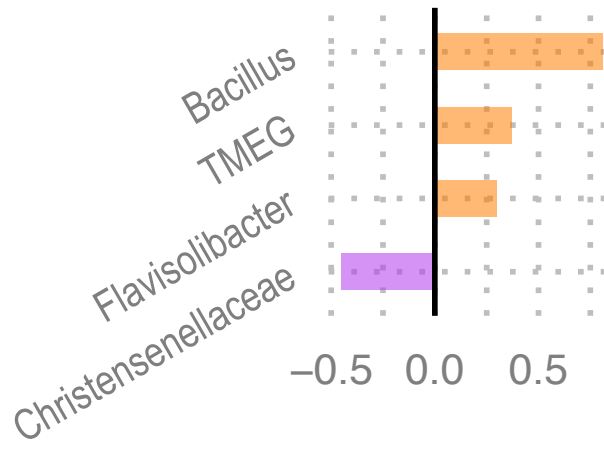

**Direct p53 effectors**

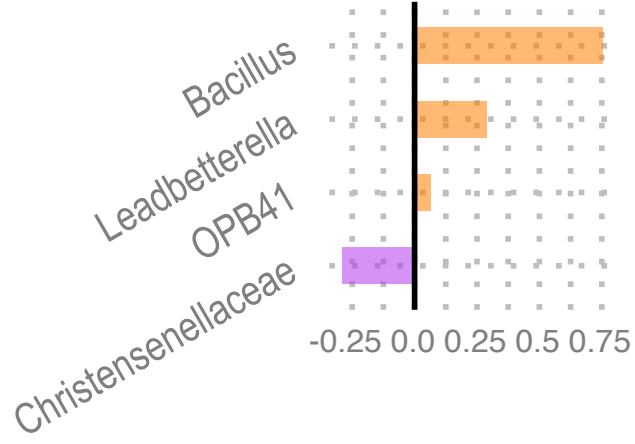

***ErbB1* downstream signaling**

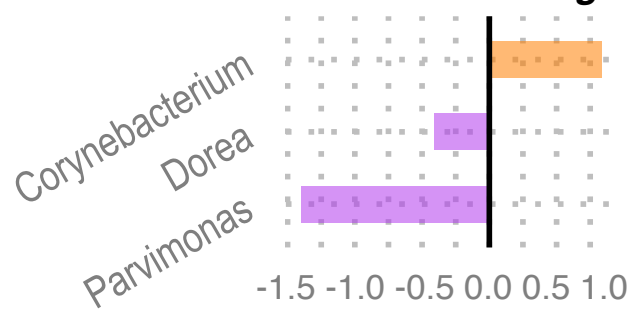

***Insulin pathway***

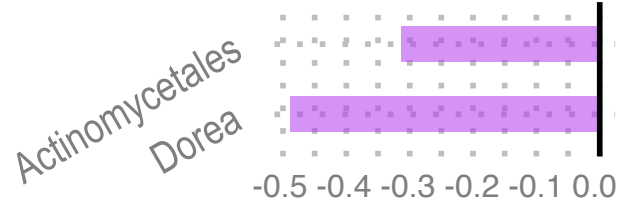

***Neurotrophic factor-mediated Trk signaling***

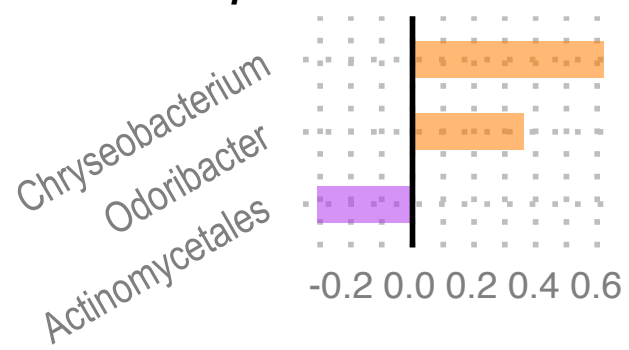

***p75 (NTR)-mediated signaling***

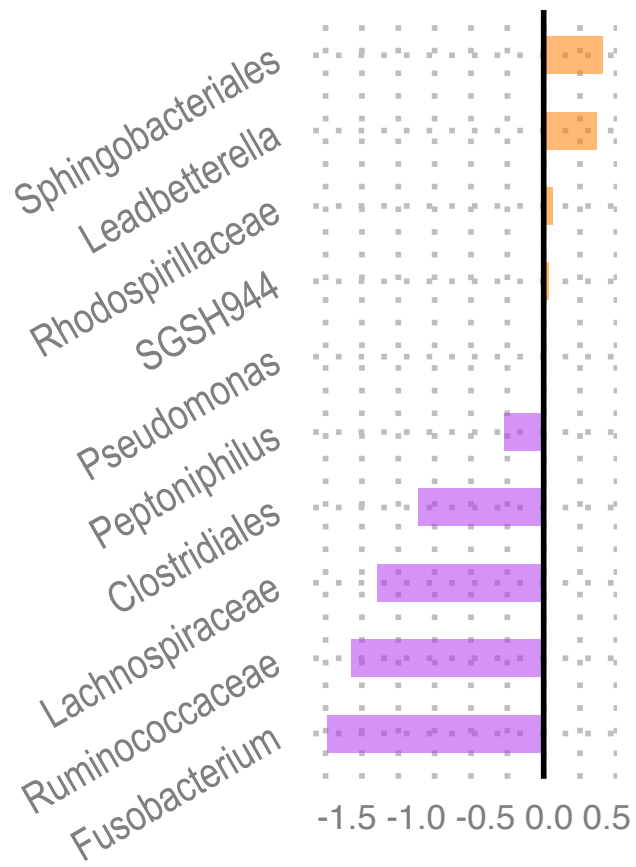

***PDGFR-beta signaling pathway***

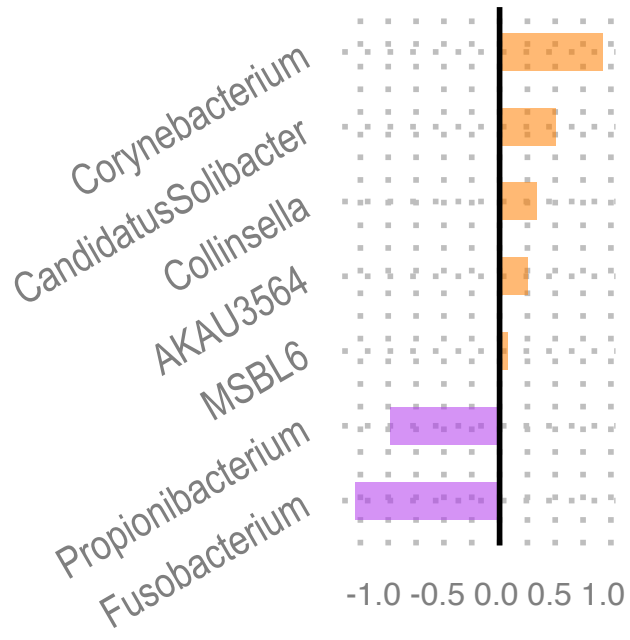



***Presenilin action in Notch and Wnt signaling***

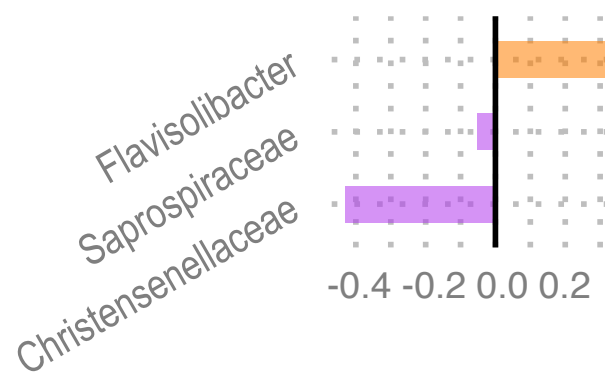

***Regulation of CDC42 activity***

File intentionally blank -no taxa met the abundance-difference threshold for inclusion

**Regulation of nuclear beta-catenin signaling and target gene transcription**

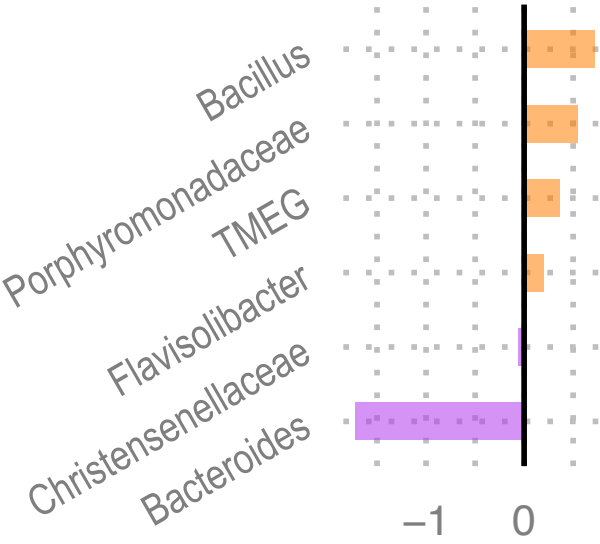

***Regulation of telomerase***

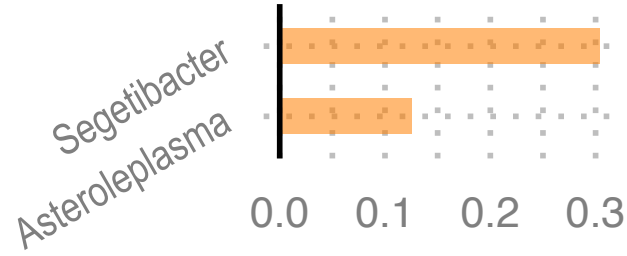

**Signaling events mediated by Hepatocyte Growth Factor Receptor (c-Met)**

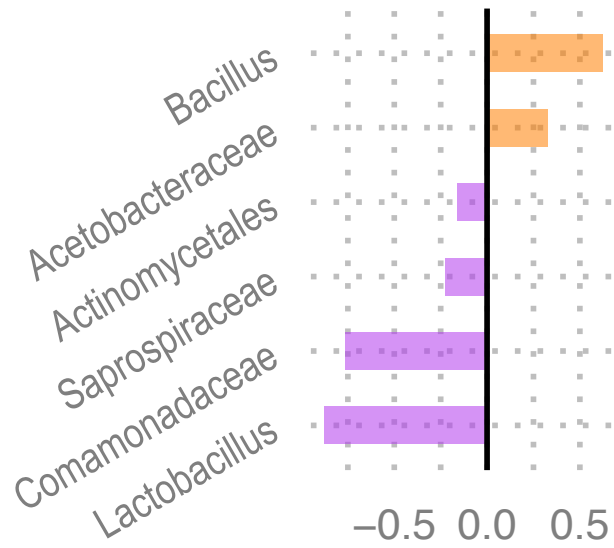

## S12 Fig | Abundance Dotplots.

### Genes

# ANKRD36C

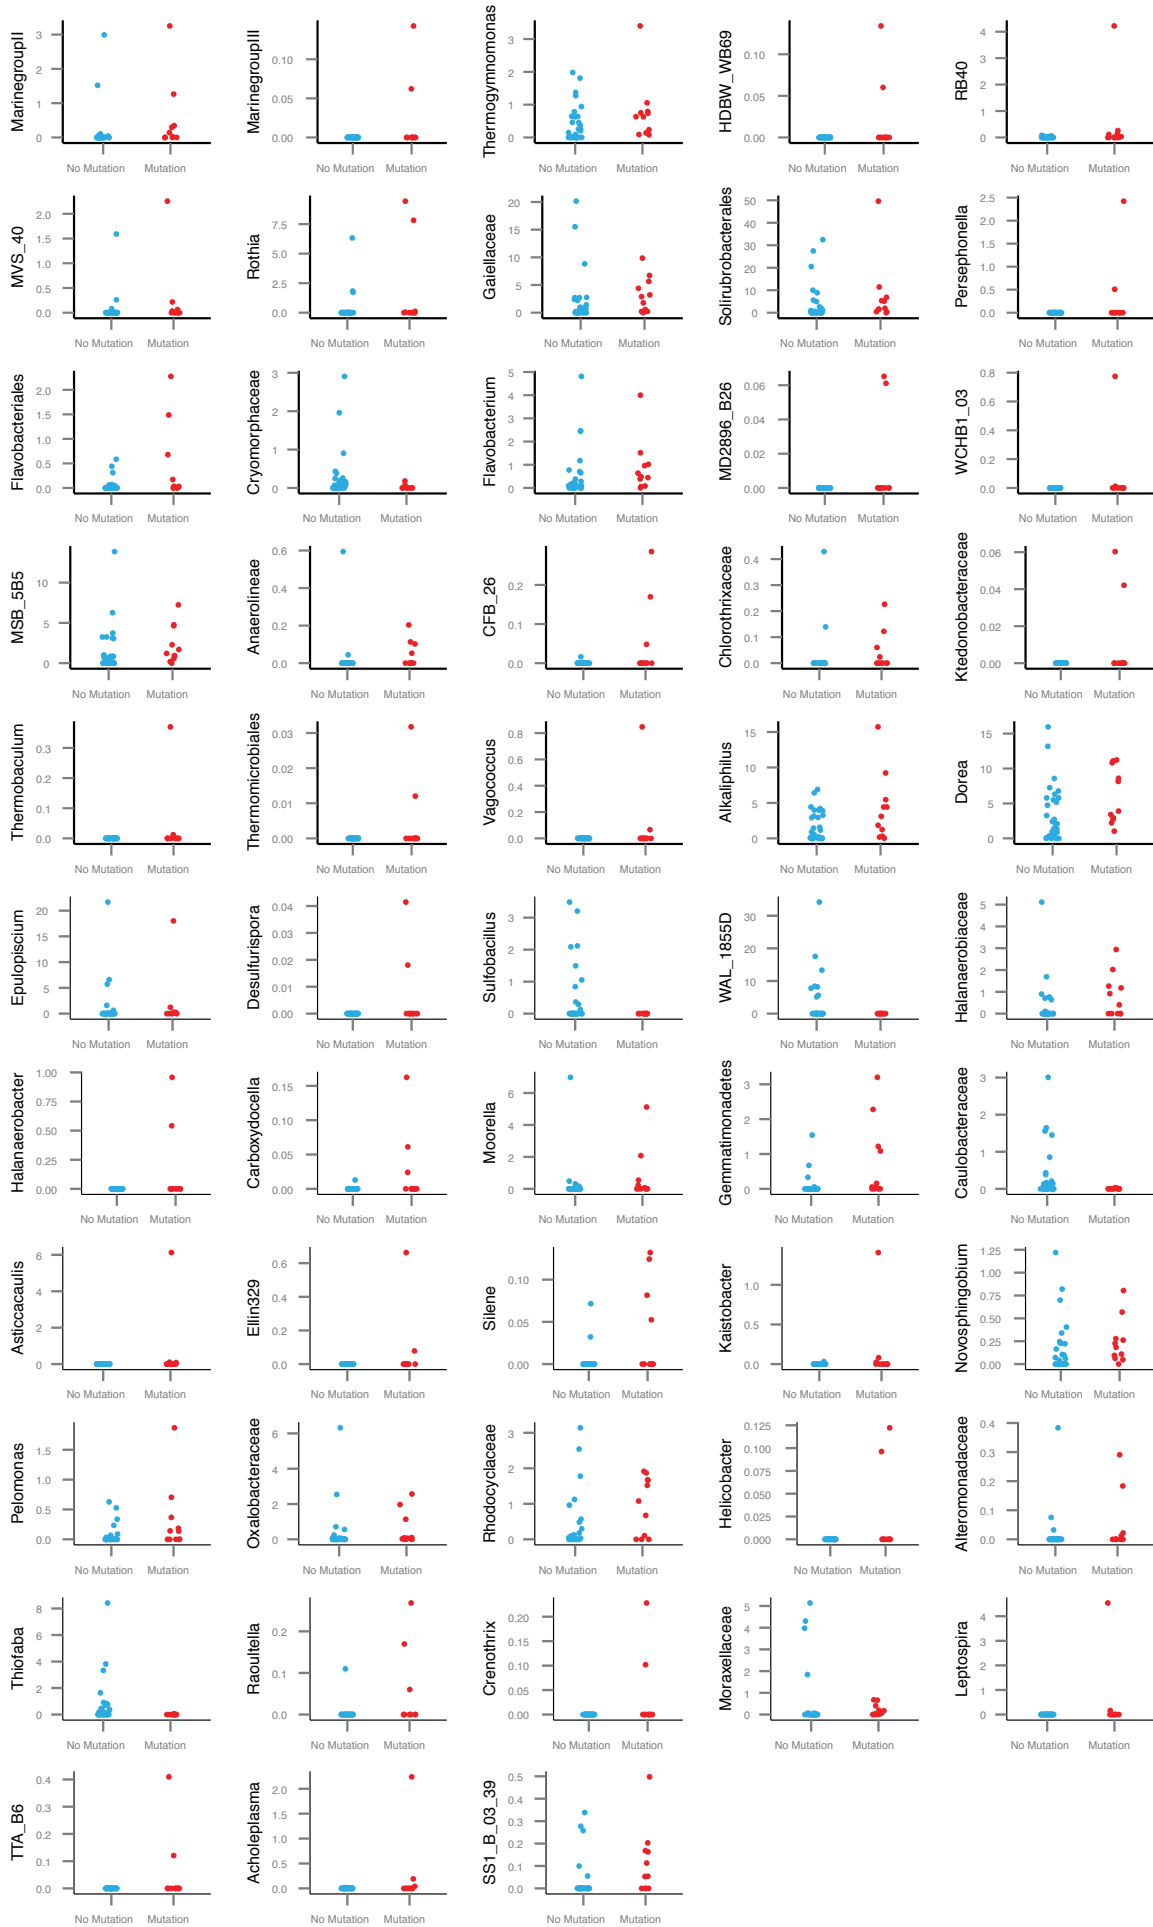

# APC

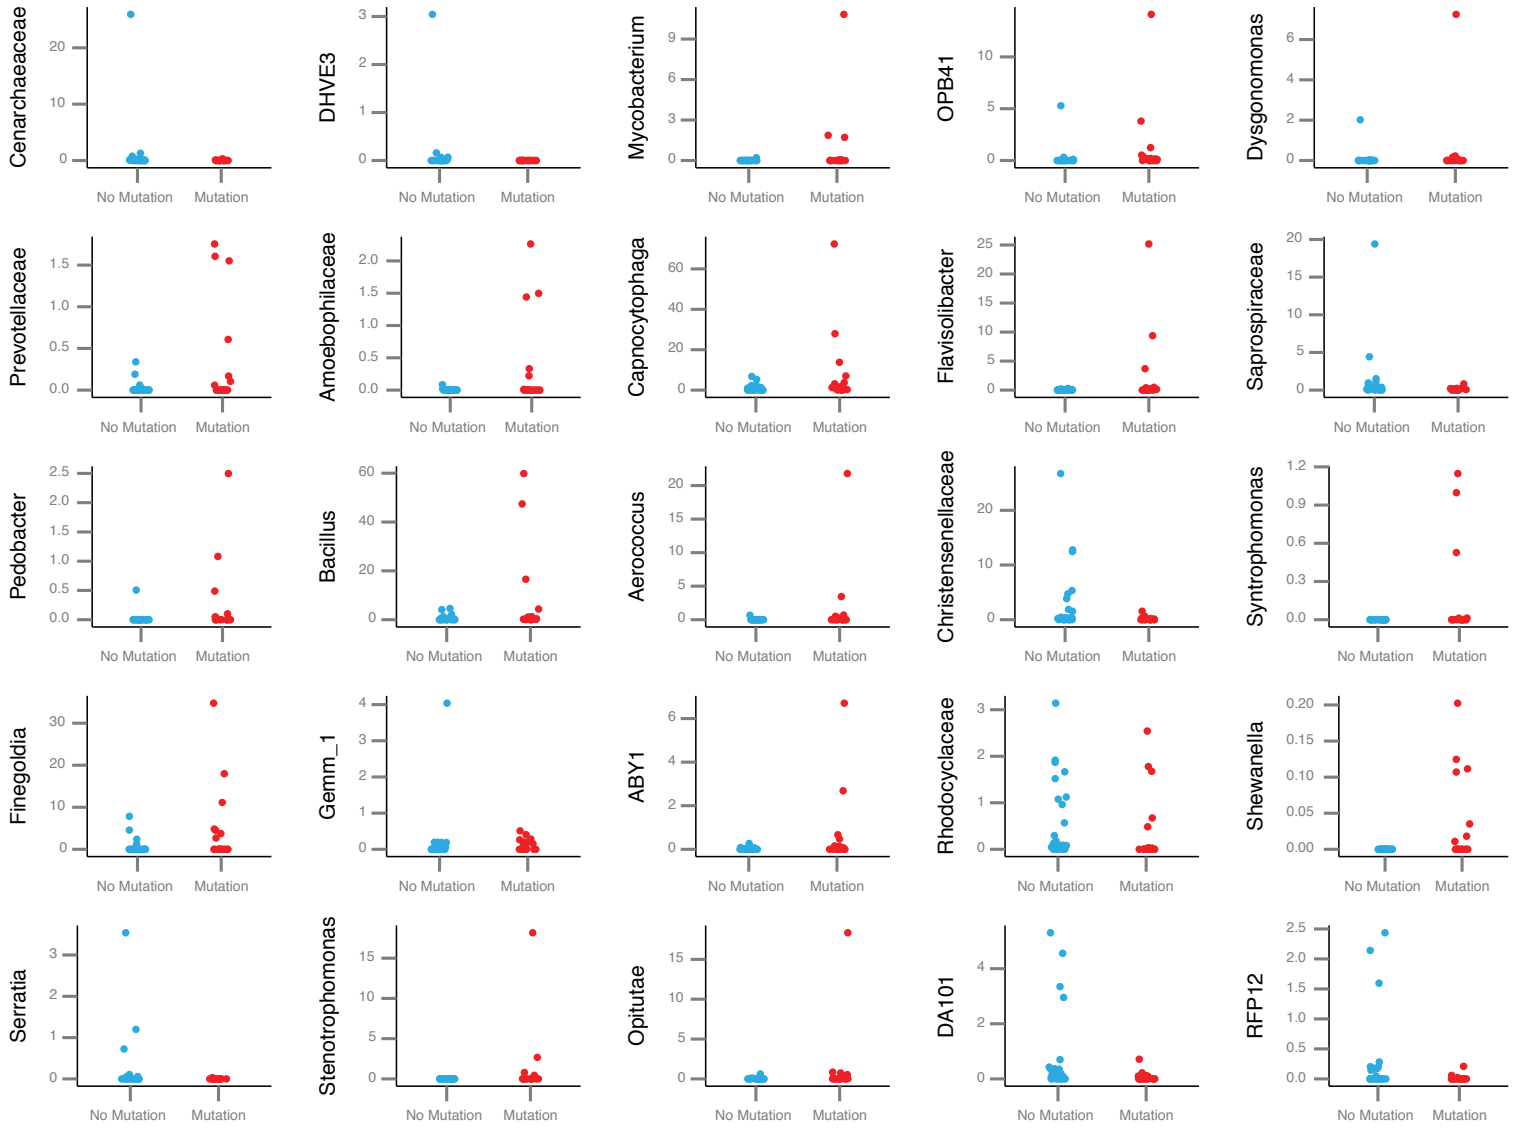



# CTBP2

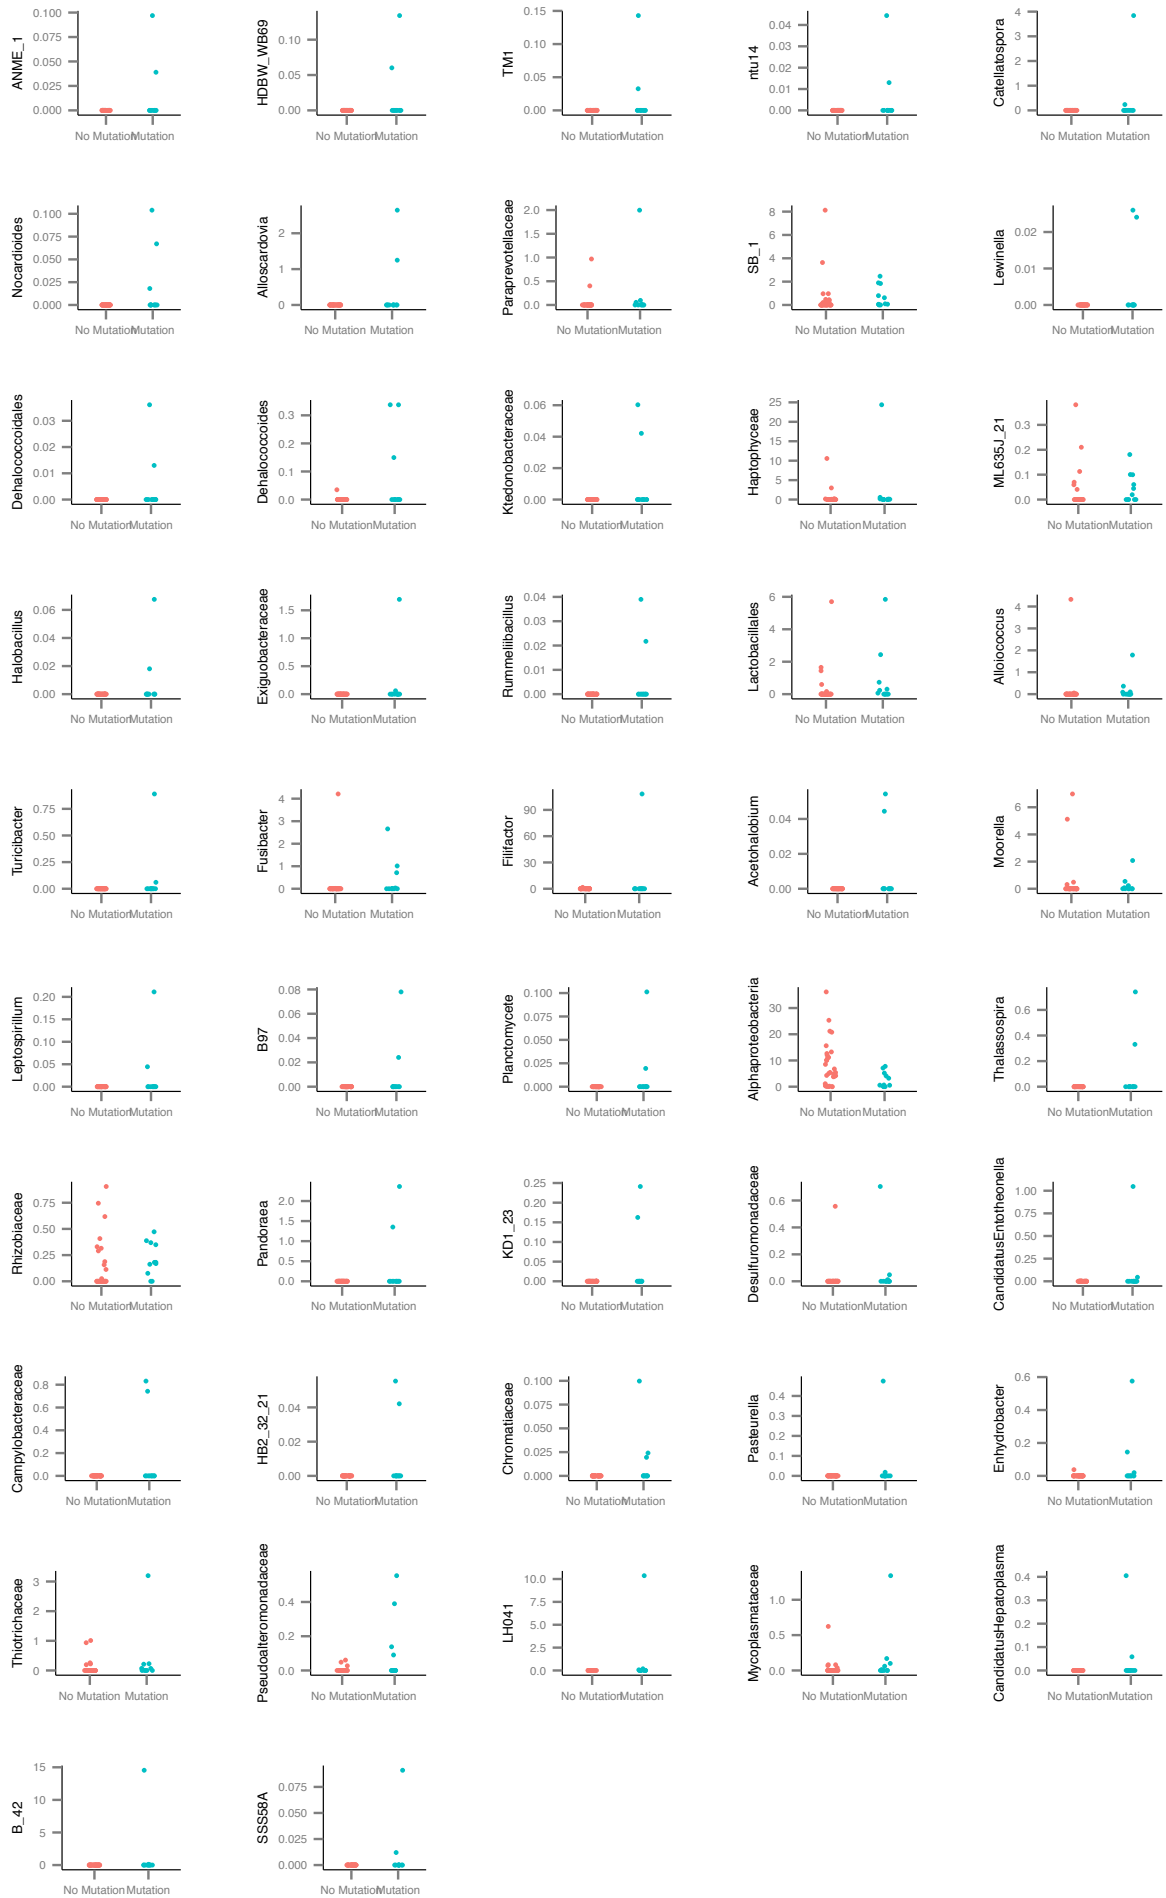

# KMT2C

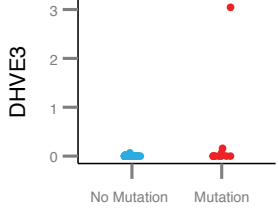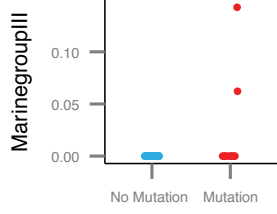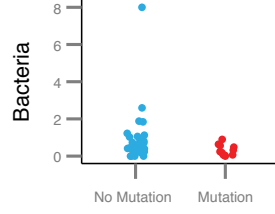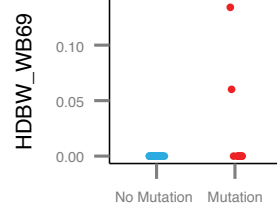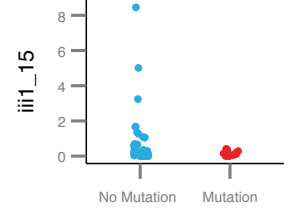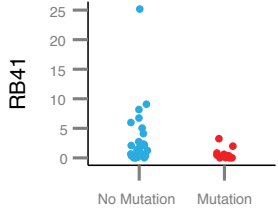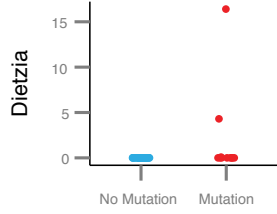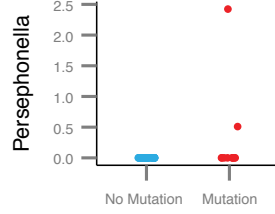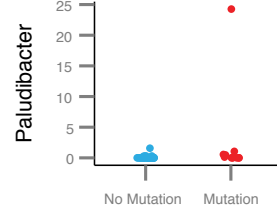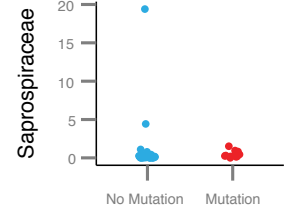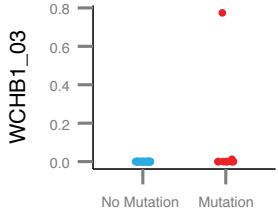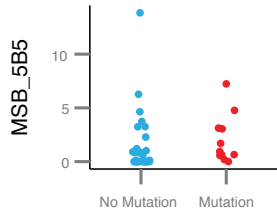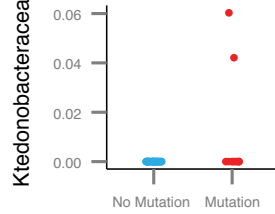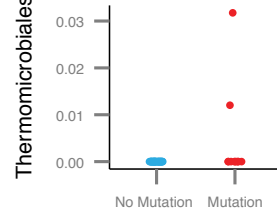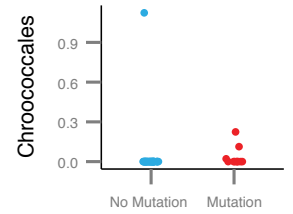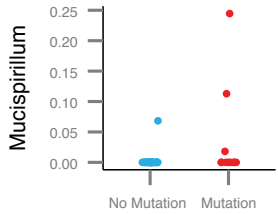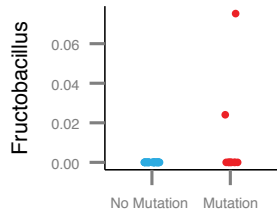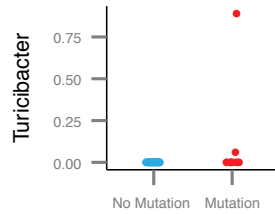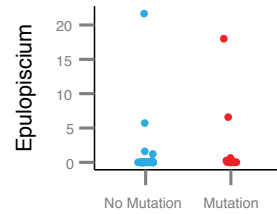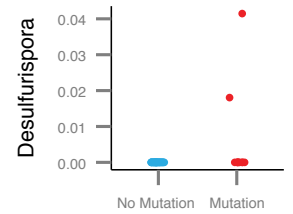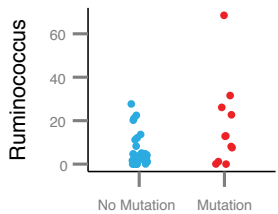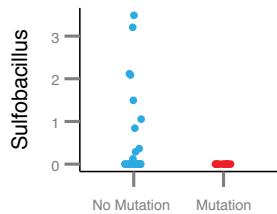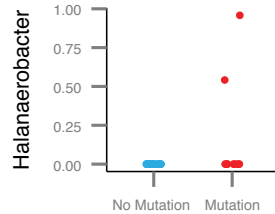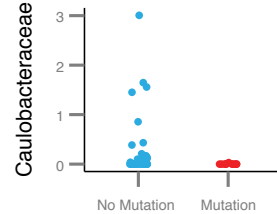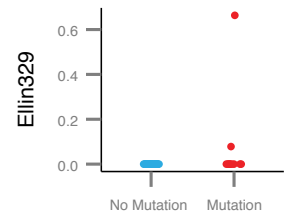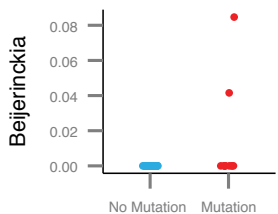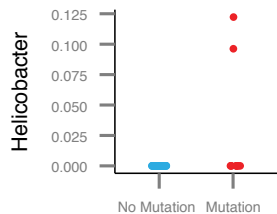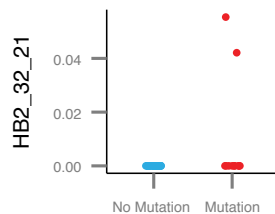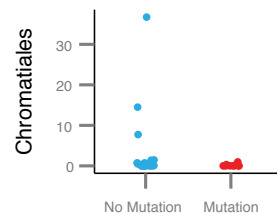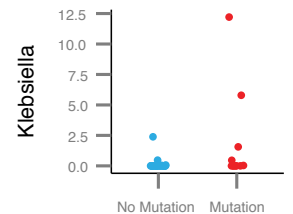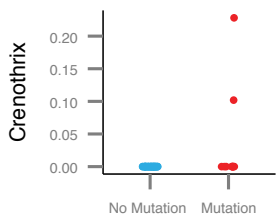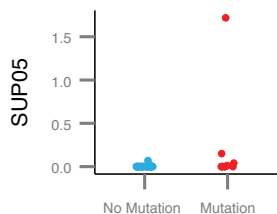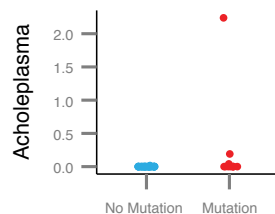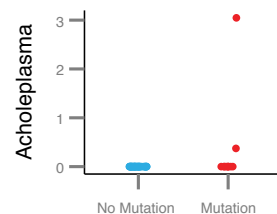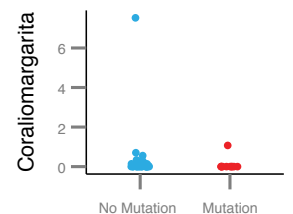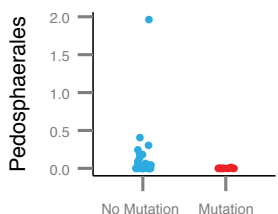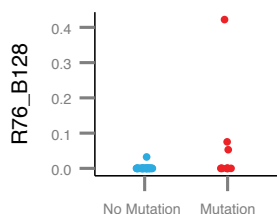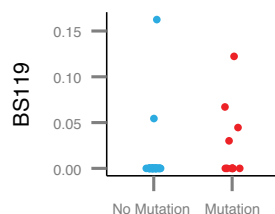

# ZNF717

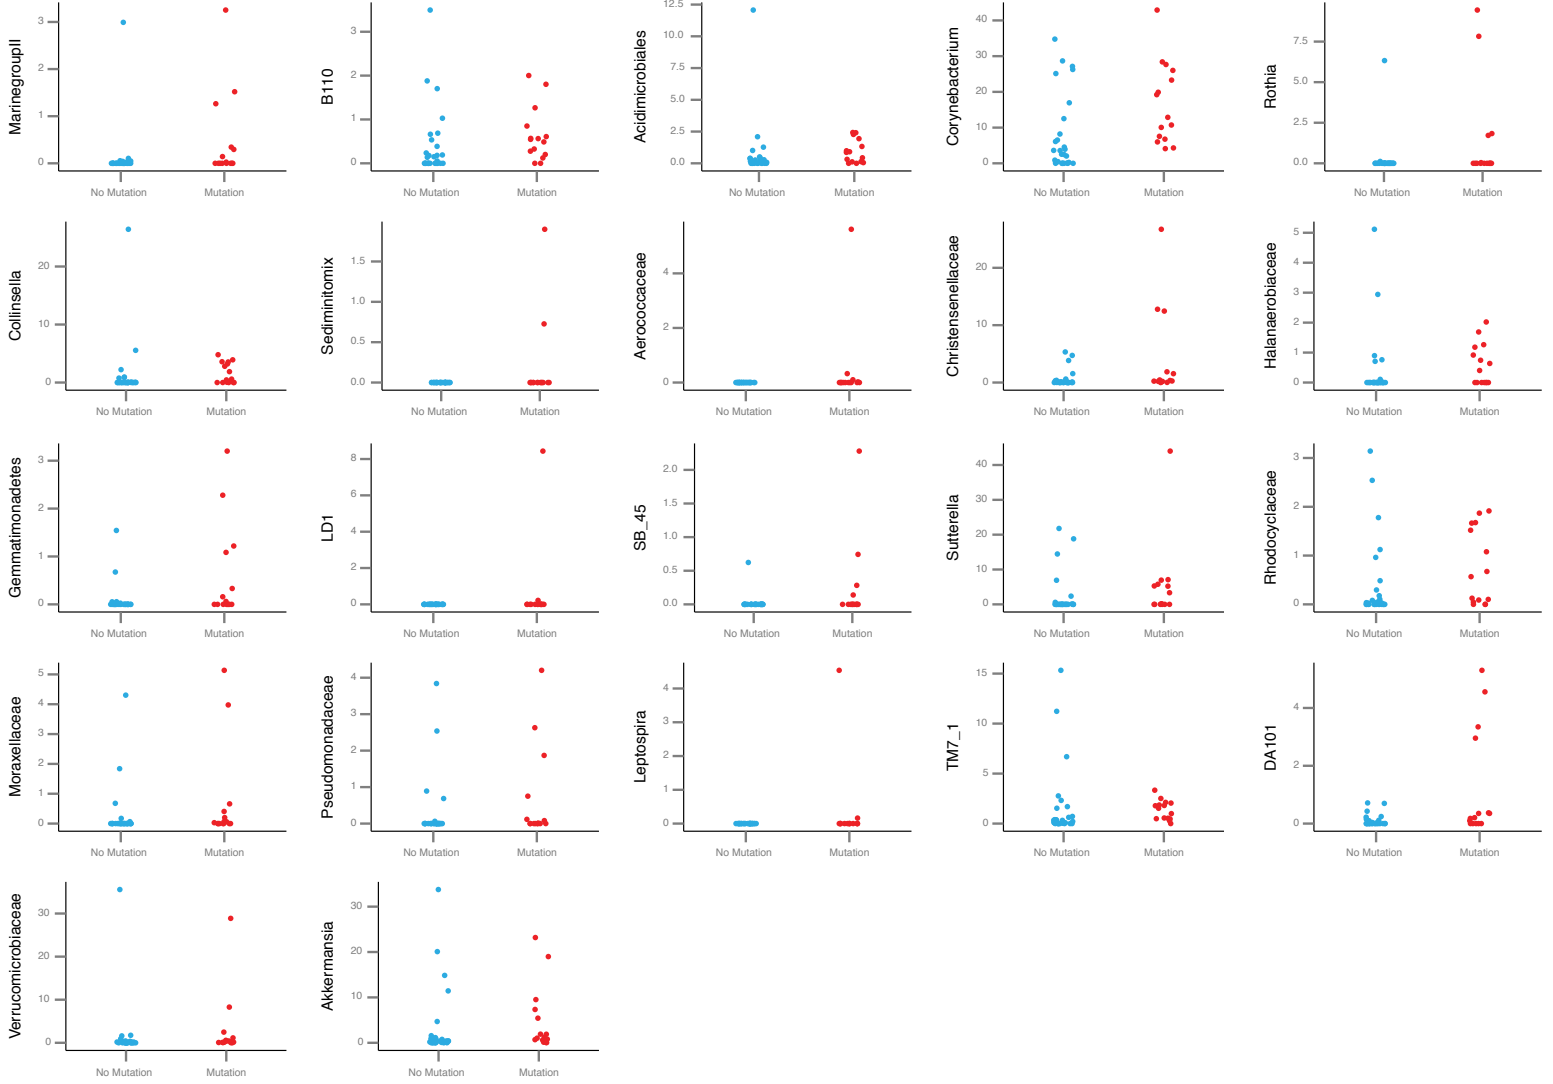

# S12 Fig | Abundance Dotplots.

KEGG

# ABC Transporters

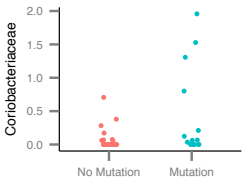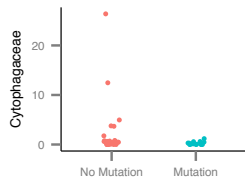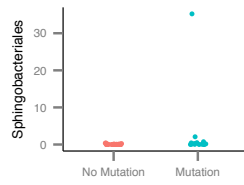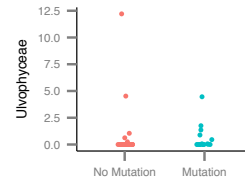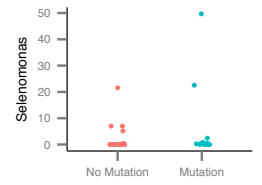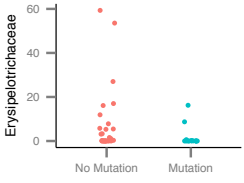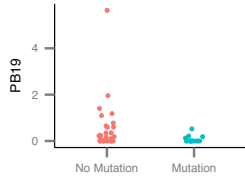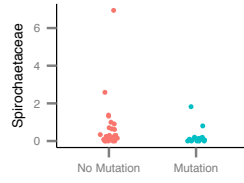

# Adherens junctions

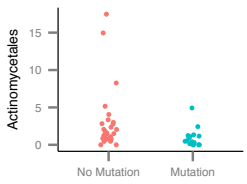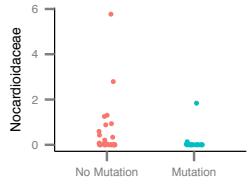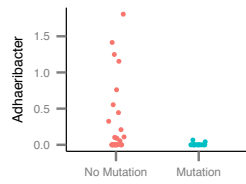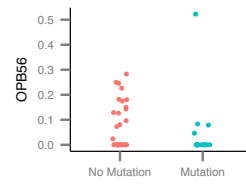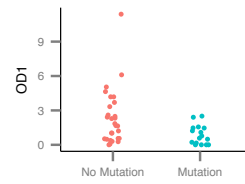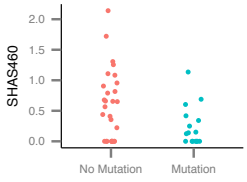

## Alanine, aspartate, and glutamate metabolism

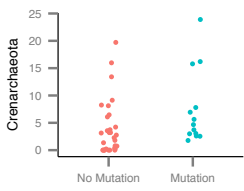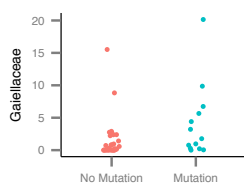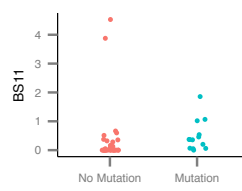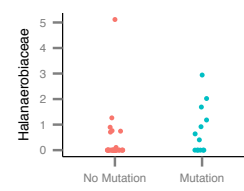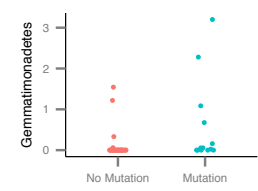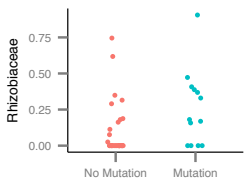

# Cell cycle

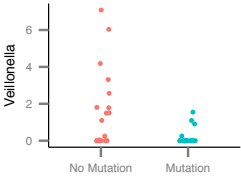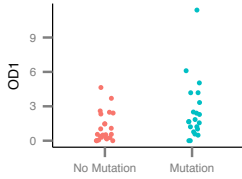



## Cysteine and methionine metabolism

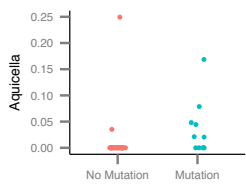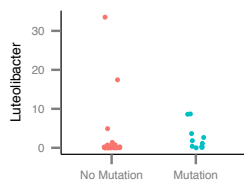

# Focal adhesion

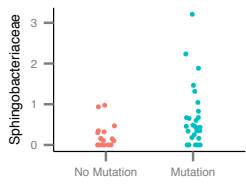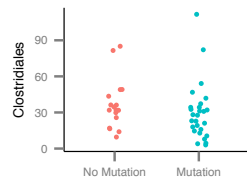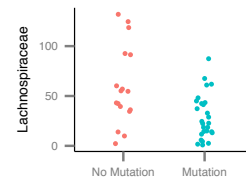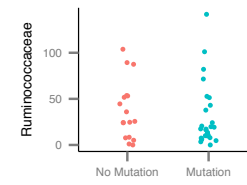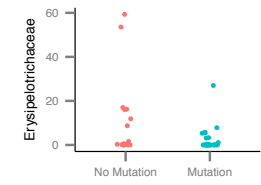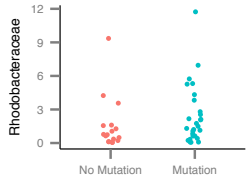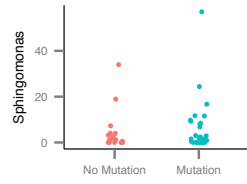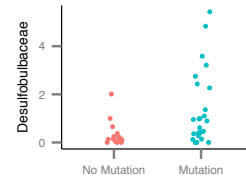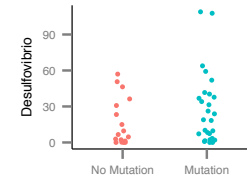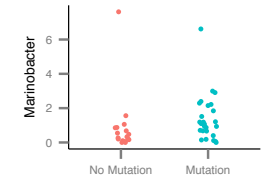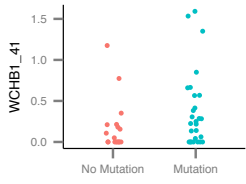

# Lysine degradation

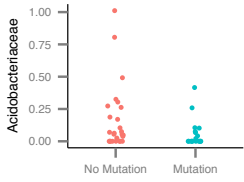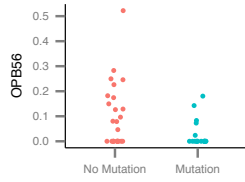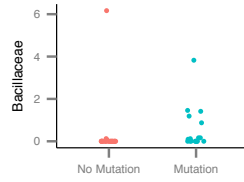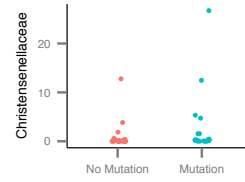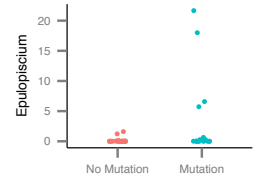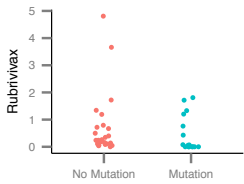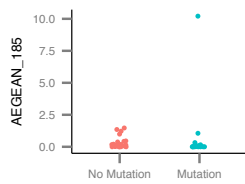



# Notch signaling pathway

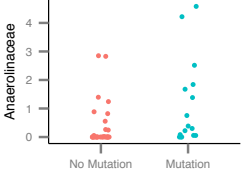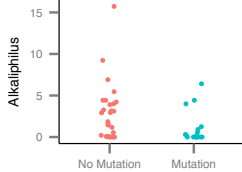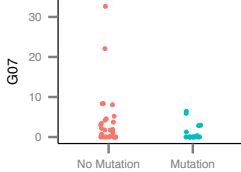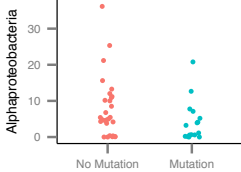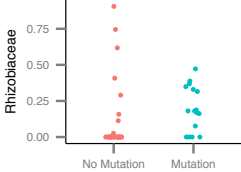

# Oocyte meiosis

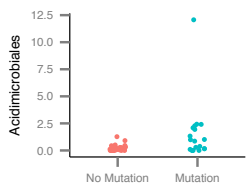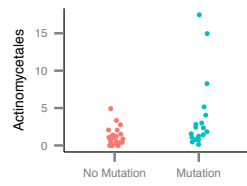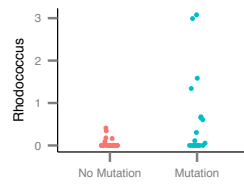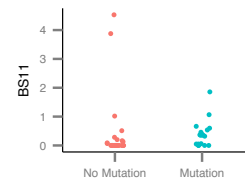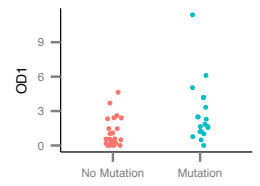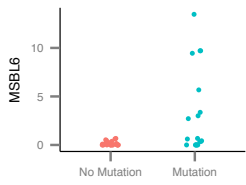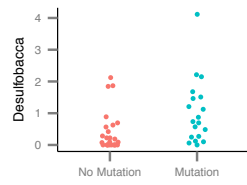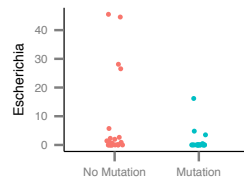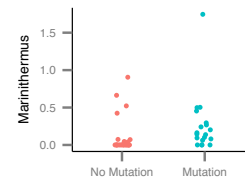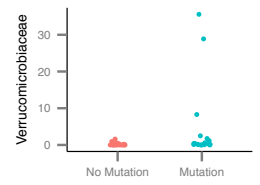

# Oxidative phosphorylation

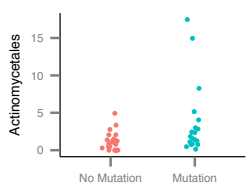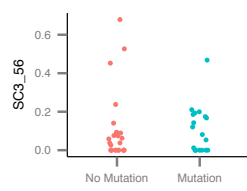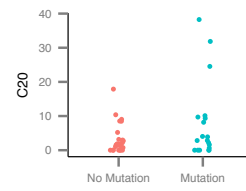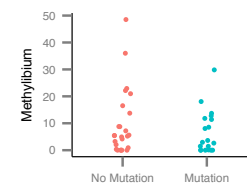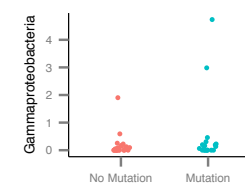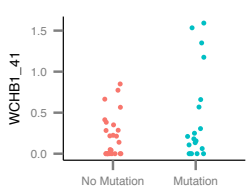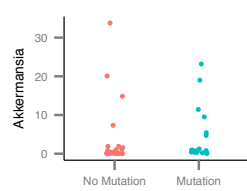

# Phosphatidylinositol signaling system

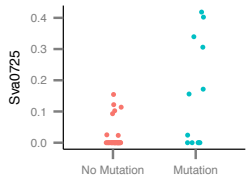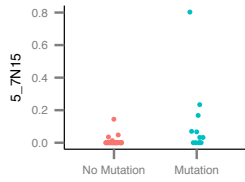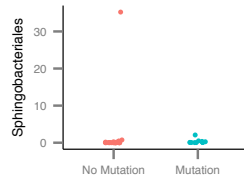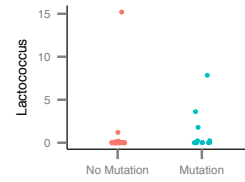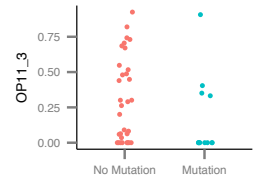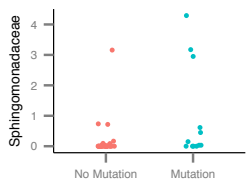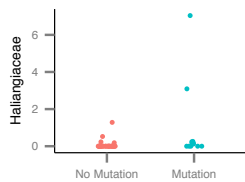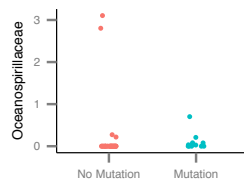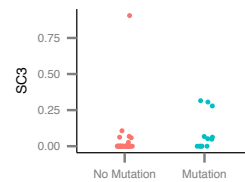



# Protein processing in endoplasmic reticulum

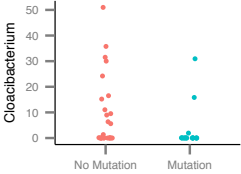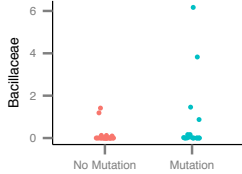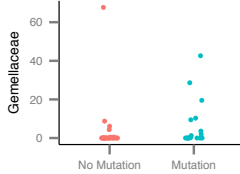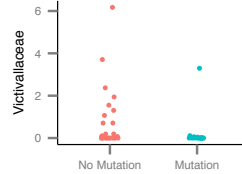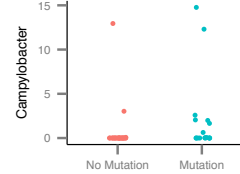

# Purine metabolism

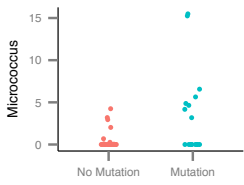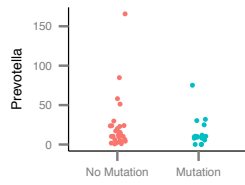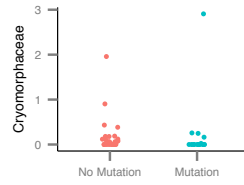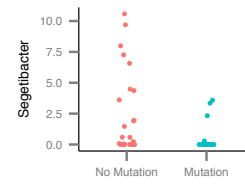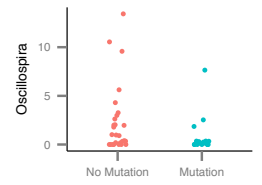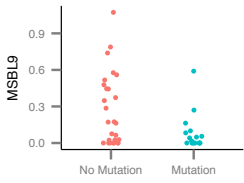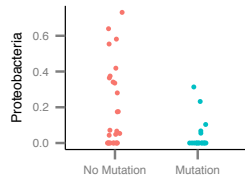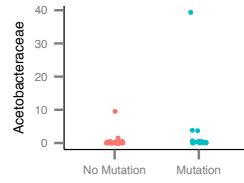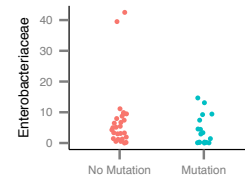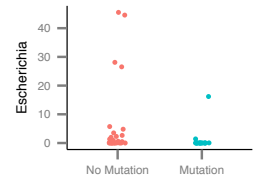

# Regulation of actin cytoskeleton

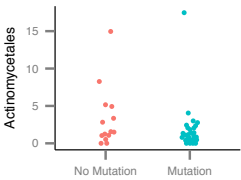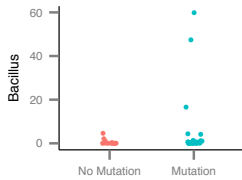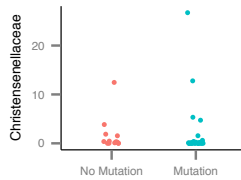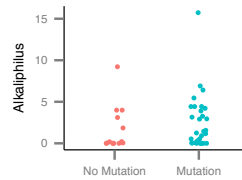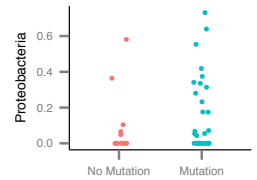

# Ribosome

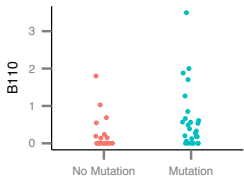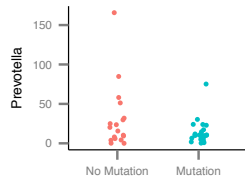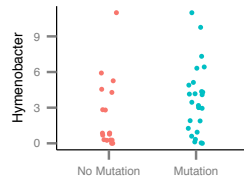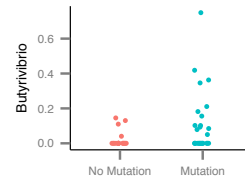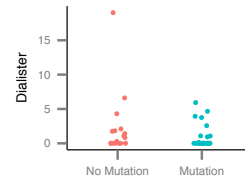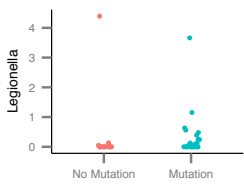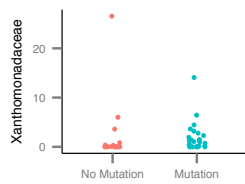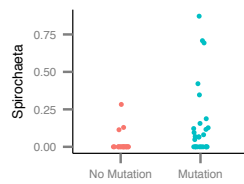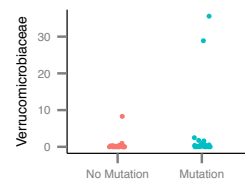

# RNA degradation

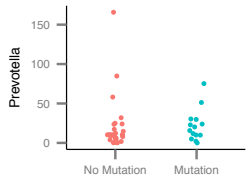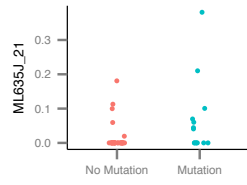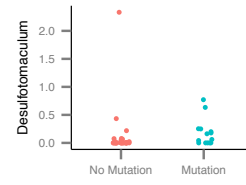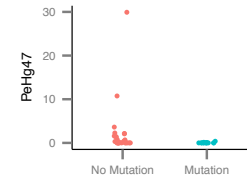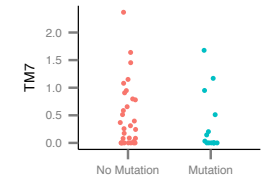

# RNA transport

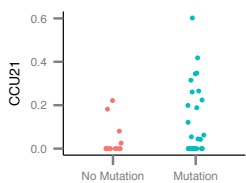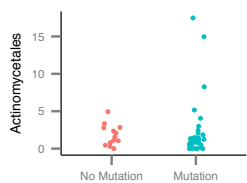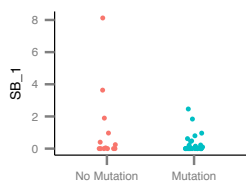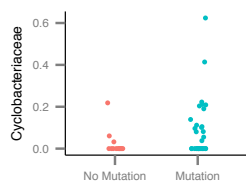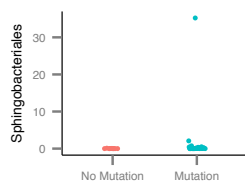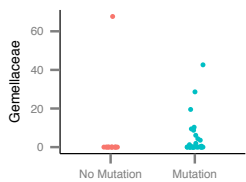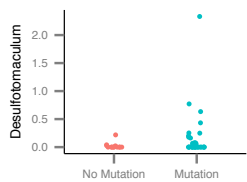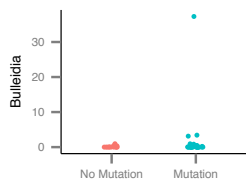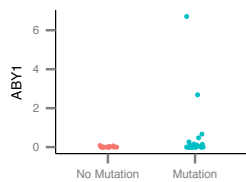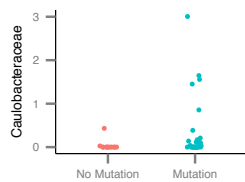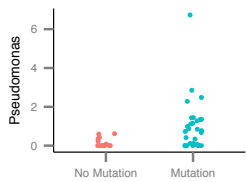

# Spliceosome

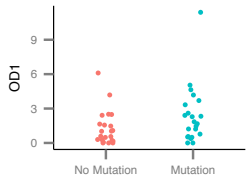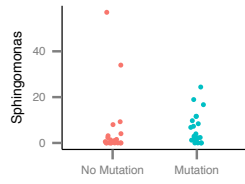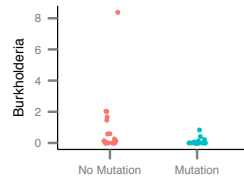

# Ubiquitin mediated proteolysis

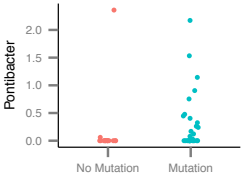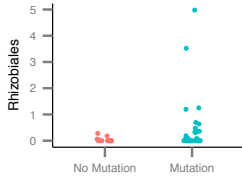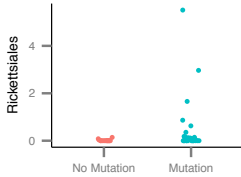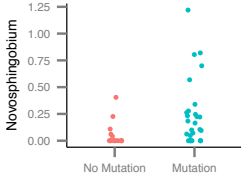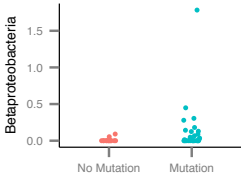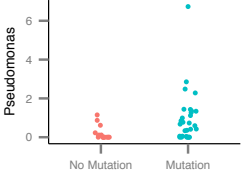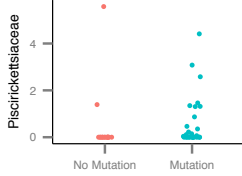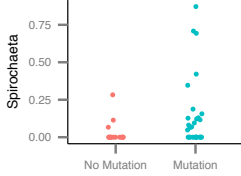



# Wnt signaling pathway

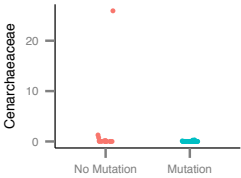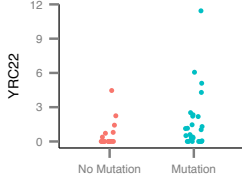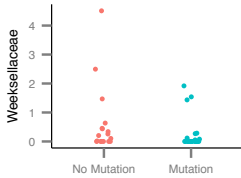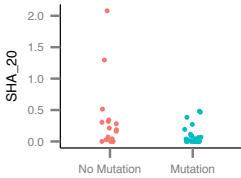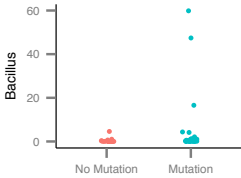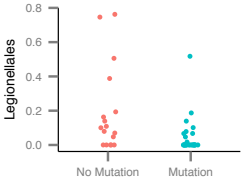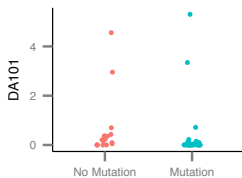

# S12 Fig I Abundance Dotplots.

PID

# Canonical Wnt signaling pathway

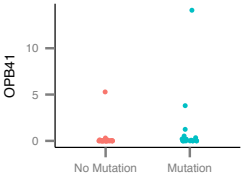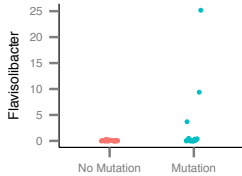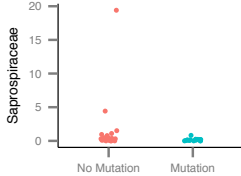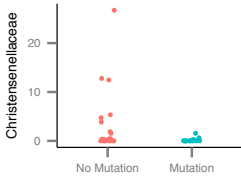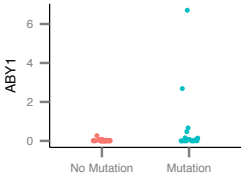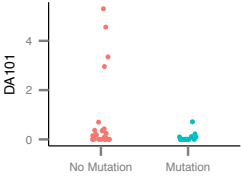

## CDC42 signaling

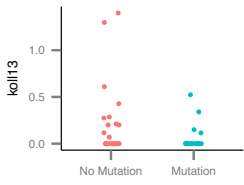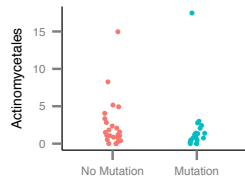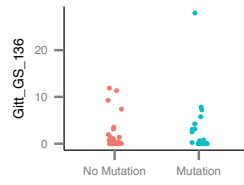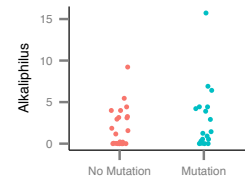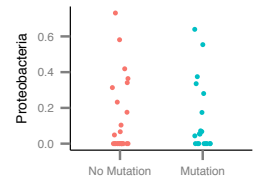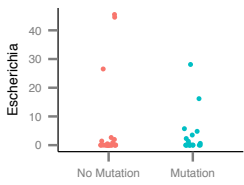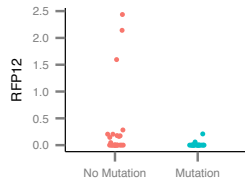

## CXCR4-mediated signaling

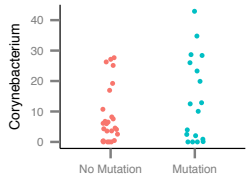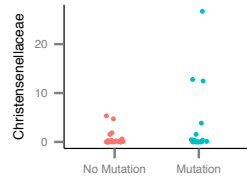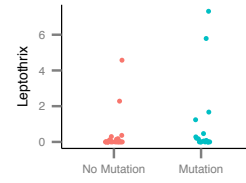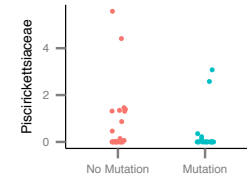

## Degradation of beta-catenin

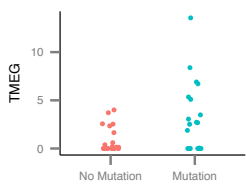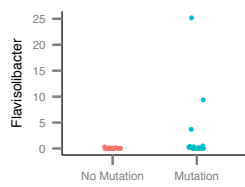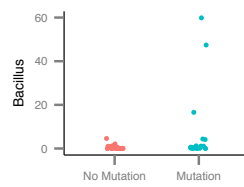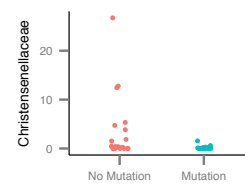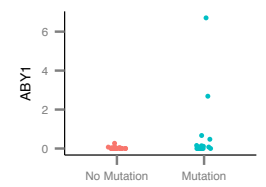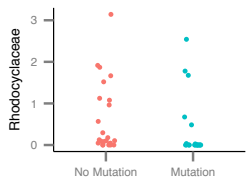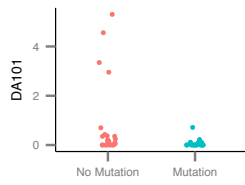

## Direct p53 effectors

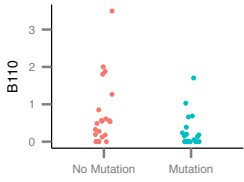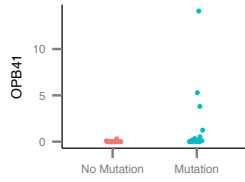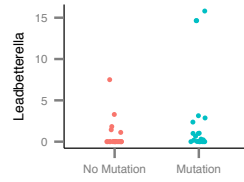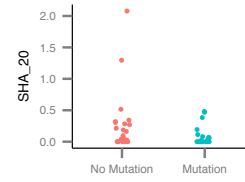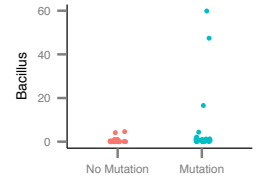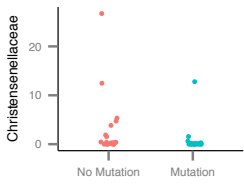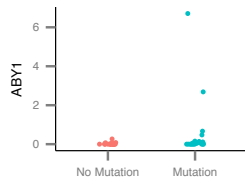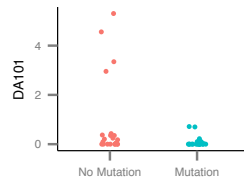

## ErbB1 downstream signaling

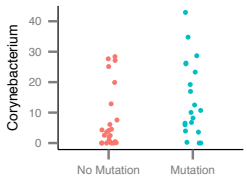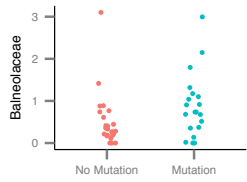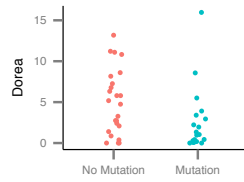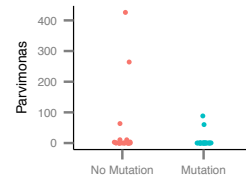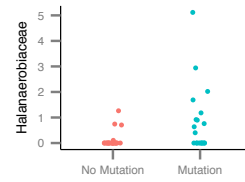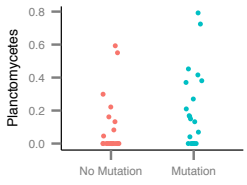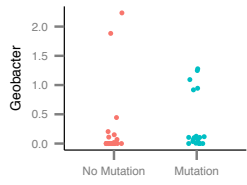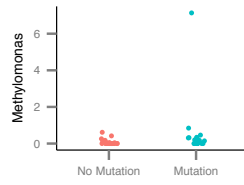



# Insulin pathway

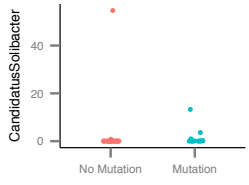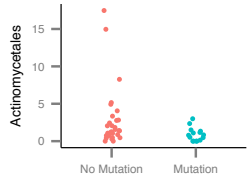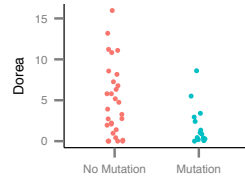

## Neurotrophic factor-mediated Trk signaling

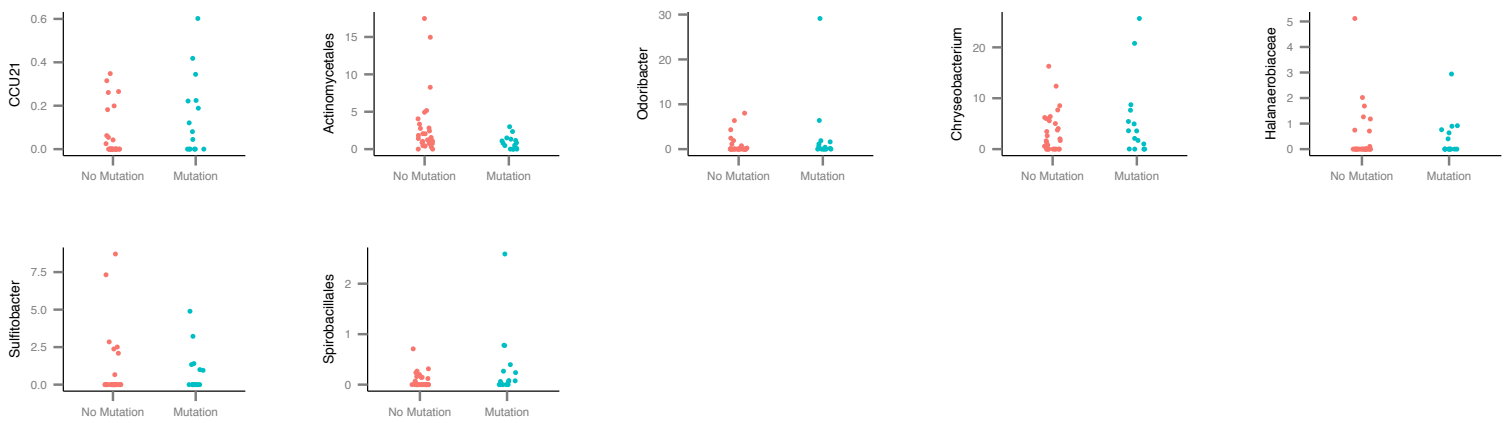

## p75 (NTR)-mediated signaling

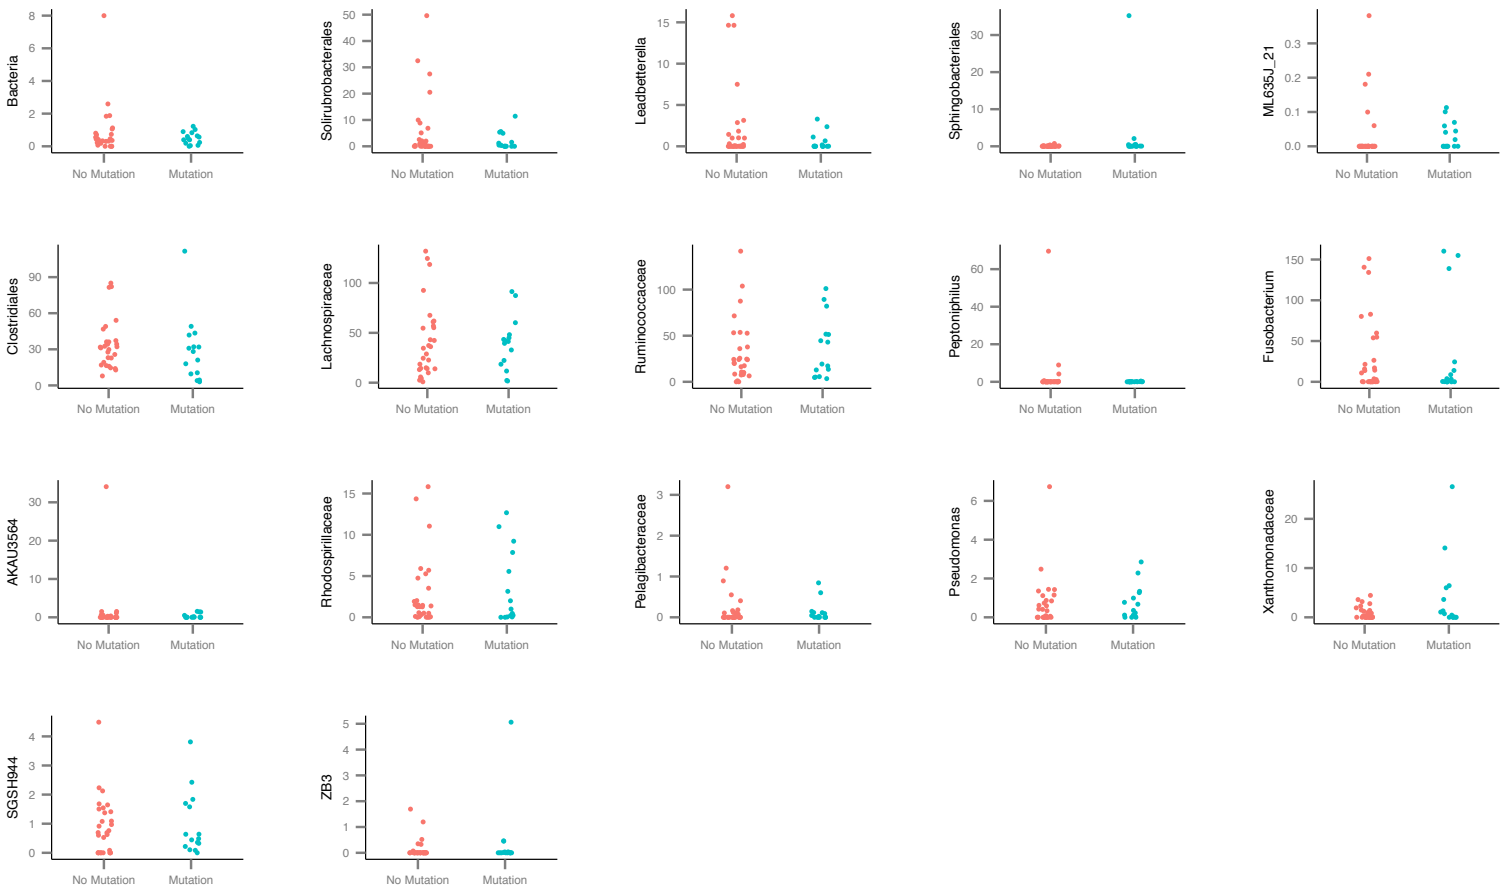

# PDGFR-beta signaling pathway

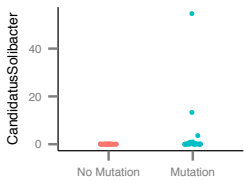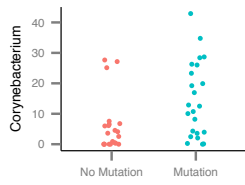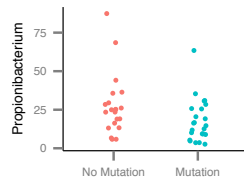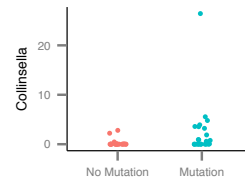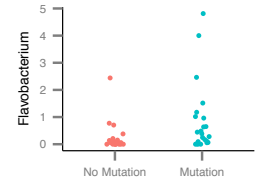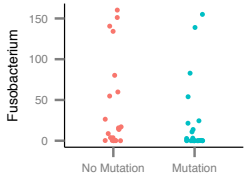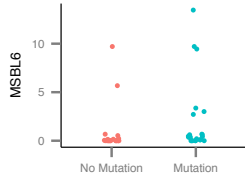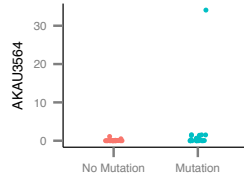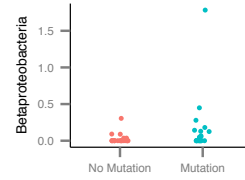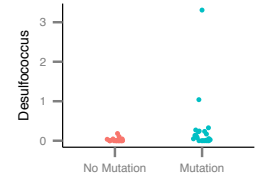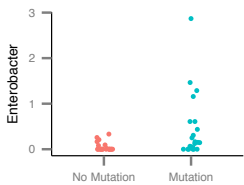

## Presenilin action in Notch and Wnt signaling

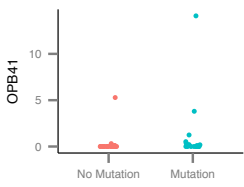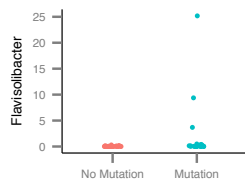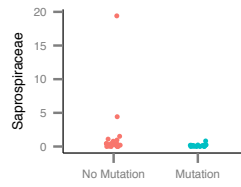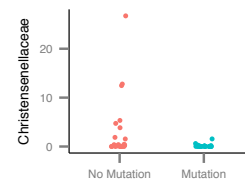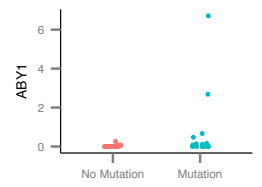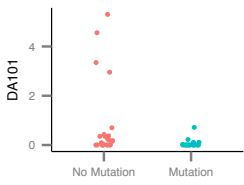

# Regulation of CDC42 activity

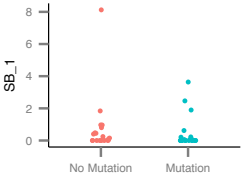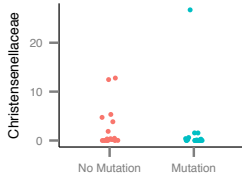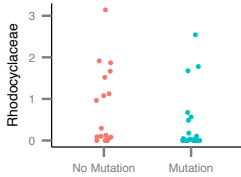

# Regulation of nuclear beta-catenin signaling and target gene transcription

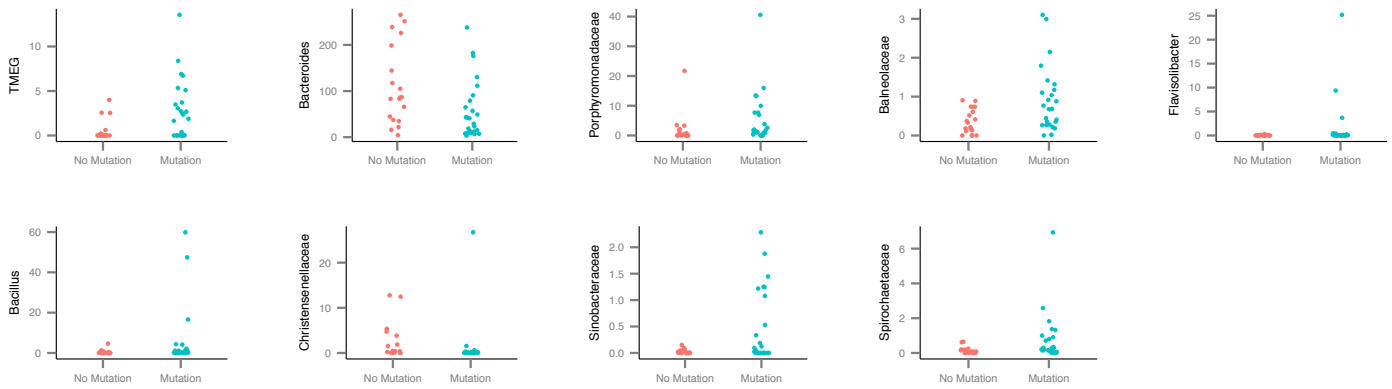

## Regulation of telomerase

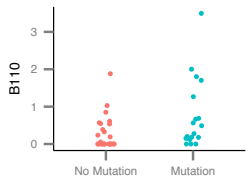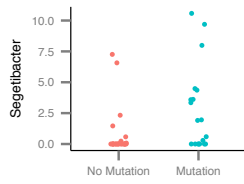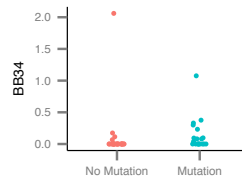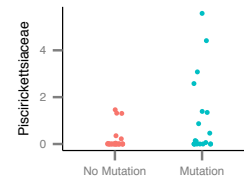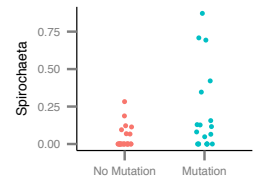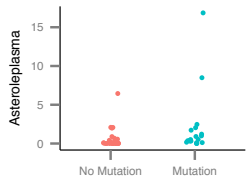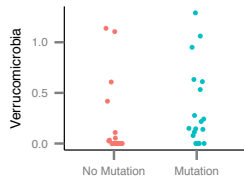



# Signaling events mediated by Hepatocyte Growth Factor Receptor (c-Met)

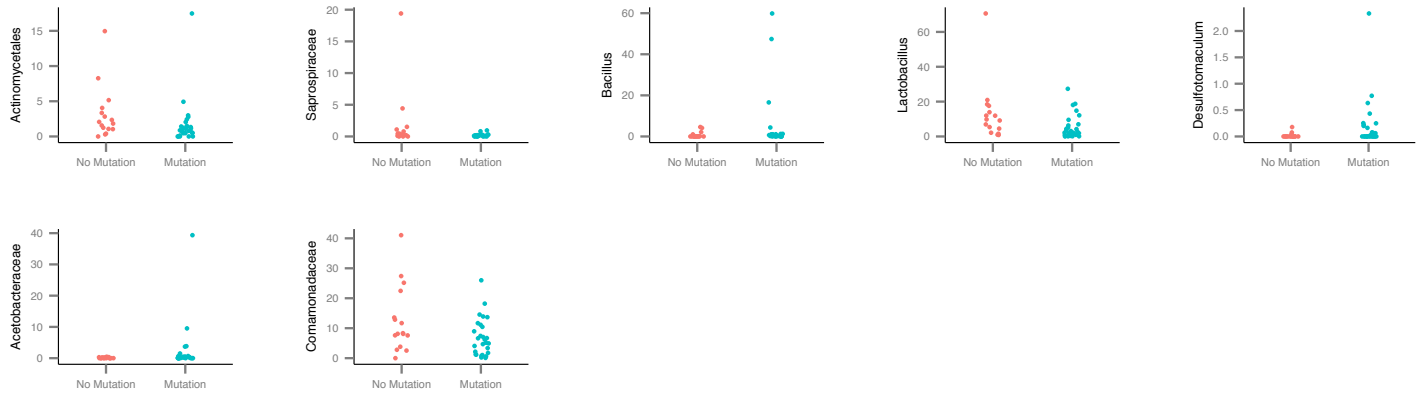

Supplement: Supplementary file [file 090795-14.pdf]
